# Supplementary material
Source: PubMed Central journal article supplement (PMC3761313)
Supplement: 2009458b9e2bc6d36a129b5046be1fea_genetics.113.151639-2.pdf [file 2009458b9e2bc6d36a129b5046be1fea_genetics.113.151639-2.pdf]

File S1

Sequence raw data for genes listed in Figure 2B

*unc-104<sup>bris</sup> R561H*

CGCTGCTCAGAAACGATGGTGTGGAGCATGCGCGGGATTCTCACGAAGAAGACTCCGCATTTGGTCAACCTAAACGAGGATCCCAATC  
TGTCTGAGTGTCTGCTTTACTACATCAAGGAGGGTCTAACTCGGTTGGGTACCCATGAAGCAAATGTGCCCCAGGACATTAGCTCTCCG  
GATCGCACATCCTCAAGGAGCACTGCACCTTTGAGAACAAGAACAGCACGGTTACATTGCTGCCACACAAGGATGCTATCATCTATGTAA  
ATGGACGCAAGTTGGTTGAACCGGAGGTTCTTAAGACCGGTTCTCACGTGATCCTCGGAAAGAACCACGTGTTCCGCTTTACCAATCCAG  
AACAGGCACGCGAATTACGGGATAAGATCGAGACCGAAAATGAGGCTGAGAACGAAGTGGAGAAGACAGACCCAGCAGGTGGACT  
GGAACCTTGCCAGTGCGAATTGCTCGAGAAGCAAGGCATTGATCTAAAAGCTGAAATGAAGAAGCGTTTAGACAACCTTGAGGAAACA  
GTACAAGCGGGAGAACTTCAGGCCGATCAGCAATTCGAGGAGCAGCGCAAACGTACGAGGCTCGCATCGATGCTTTGCAAAAACAG  
GTTAGAAGACAAATCCAATGAA

*unc-104<sup>bris</sup> V772L*

AAGGAGCCAGTGCCGTTCCGTTGAGTTAAAGAAGAAGGTACATAGTTTACGCCTATTACTTAACATAATAGATTAGAGATCATATACTT  
AAATATTTATTTAGGTACAATTCCAATTTACTCTCTTGACCGACACCTTGACTCTCCTTTGCCGCTGAGCTGGCATCCACTGTGGCTCCT  
TTGCATCAGGAGGATGAGTTCGGAGCTCCACCTGTCTAAGACCTTGGTGGCCGTCGAAGTTACCGATACTAAGAACGGAGCCACTCA  
CCACTGGTCTCTGGAGAAGTTACGGTAGGTTCTTTATATCCGGAATCCATGCGAATTCCTGCTACTCCCTCACATTCATTCTCTGCA  
CTTTGGTTAAAATTAATAAAAAAAGCTGGCTTTTGATTTGAGTTGAATATTTAAATAATACGTGCATGGGGGTTGTAGTTCATGGATT  
CTAGTTTCTATCAAACGCTCTAAAATTTGTTGGTTACTTTTATACTTTGGCTGTAATAAAGCAGAAAAAATCACAA

*unc-104<sup>bris</sup> D1073E*

TTCAAGATTTCAACCAAACCAAAACATCGTGCTTAGCCAAAACCGTAGACGTGGGTGCACATGGTAGTGGTCCAAATTTGGGACTACGCA  
CTGGCTGACTGATTGGTATGCTCGGTGGCAACATGCGACGTGGTGGTGGCCGGAAACAACTCCTGTTGGCATCCTTATGCAATGGG  
TGCGTCTGGTAGTGCCAAATATCTTGAACATTATGGGTTGGGTTCTCAATACTCGATGAAGGATTTGGTTACGGGTACAGTTATCTAC  
AGAAAAGATAACAGTTAATAATTGATATGGTGGAAAGCTCTTGGTAATCTTGAATCTTCCACTTACGTTCTGAACATGGTAGAAGCCTA  
GAGGAGCACCCGATGCCGAATTTGACGGGTTCCGGTGGAGAAAGCCTCCTCATGACGATGCAAAAAGCTGAAAGGTAACAGTTTATA  
AACCACAAACCTAAAGTTAATTTCCGAAAGATTACGTACTTGAACCTGGCAGAAGATATCGGCATATTCAGCCCAATACCAAGTGGCCTGT  
AGCACAGTGACCCGAAAGTGAACCTCTTGCACCTGCAGATGCTCGCCAGGCTCCTCCGAATTTCTGTTGCACTCGGATGCGGAGTTA  
GAGTCAATGCCACGACCAGAG

*unc-104<sup>bris</sup> V1170M*

ACGTCGTCGAGTCCAGGCAGCCTCAAACGGTAGAAAAGATCTATCATCTCCGGGCACCTCAAAGCCTCGCCTGGGAACAAGCCCAAAGA  
TAAGACACAGGCGTCTTCGTCCTGTCGCGATGACTCCGGTGTATTGCGGATACGTCCAACCACCAACTATTGATGTCCTTCCACTTC  
ATCTCGGTTGTGGGCTCATGTACGATAGTAATACGAATGCGCCGCTGGATGCCCTGATGCAAGAGGAACAGTCCGCGCAGGGAAGAT  
CATCGCTGTGCTCCACCACCTGTTGACAAATTTATGTTTGGATTATTGCGTGTGAGACTGGGAAAGATTACATCTGCGCCATACTAACCGA  
TGGCACATATTCTCATTGGGAGCCAATTCACAGATTTCAAACCAACCAAAAACATCGTGCTTAGCCAAAACCGTAGACGTGGGTGCACA  
TGGTAGTGGTCCAAATTTGGGACTACGCACTGGCTGACTGATTGGTATGCTCGGTGGCAACATGCGACGTGGTGGTGGCCGGGAAACA  
AACTCCTGTTTGGCATCCTTATGCAATGGGTGCGTCTGGTAGTGCCAAAATATCTTGGA

***unc-104<sup>bris</sup> A1405V***

TTGTGACACCAGCTCTACTTATGTGCGCGGCGAGGAGAATCTTCATGGCTGGAGGCCAAGGGGTGACTCCCTGATCTTCGATCACCAGT  
GGGAGCTGGAGAACTCACCAGACTTGAAGAGGTTGGACGCATGCGGCACTTGCTTCTGCTGCGGAACGCTGGGCATGGACACCAA  
CCCGAATCCGACCACCAAGACCGAGAAGGATGTTTGCAATCTAGCTGCTCGGGCAGTCACATCACCCGTACATATGGTCATTCCACAATC  
GCCGAGACTCCGGTCAAGGACCCACAGCAAATCATTCCAGAACGCGAGTACAACCAACGGGAGCAGGATCTCATGCTTAAATGCTTAA  
AATTGGTGACGGGTGAGTTAATACTGAGACTTACCAAGCGTTCATTCACTCTATTCTAAATTCATTTAAGGACGCTATACTAAGAGCGA  
GGCCAACGATACGAAACTCAGTCGGATGTTTCGCTAGCGATGAGGGATGTGCCGATATGACCGTCAGCTGCATCTCCAGCAATCCAT  
GGAGTGAGTAGTCGTTTAGCCACCCGTATAAACACACCACCCACACCAGCACCACCCATCTTAGTTAGCTG

***parental R561R***

CGGCTGCGCACGTATGATGGATATCAGTTGGCGTATTCTCACCGAAGAAGACTCCGCATTTGGTCAACCTAAACGAGGATCCCAATCTGT  
CTGAGTGTCTGCTTTACTACATCAAGGAGGTTCTAACTCGGTTGGGTACCCATGAAGCAAATGTGCCCCAGGACATTCAGCTCTCCGGAT  
CGCACATCTCAAGGAGCACTGCACCTTTGAGAACAAGAACAGCACGGTTACATTGCTGCCACACAAGGATGCTATCATCTATGTAAATG  
GACGCAAGTTGGTTGAACCGGAGGTTCTTAAGACCGGTTCTCGCGTGATCCTCGGAAAGAACCAGTGTTCCGCTTTACCAATCCAGAAC  
AGGCACGCGAATTACGGGATAAGATCGAGACCGAAAATGAGGCTGAGAACGAAGTGGAGAAGACAGACACCCAGCAGGTGGACTGGA  
ACTTTGCCAGTGCGAATTGCTCGAGAAGCAAGCATTGATCTAAAAGCTGAAATGAAGAAGCGTTTAGACAACCTGGAGGAACAGTAC  
AAGCGGGAGAACTTCAGGCCGATCAGCAATTGAGGAGCAGCGAAAACGTACGAGGCTCGCATCGATGCTTTGCAAACGGGAGGAA  
ACCCCCCCCCCTGCAGAGGGCACCCAGAAAACCTTAAGAAAAGGAATTTTCTCCTGAAAAAACACCCCATTTTAACGATATCTT  
TAAGGGGGGGCCCGTGGGTCATCATCTT

***parental V772L***

AGGAGCCAGTGCCGTTCCGTTGAGTTAAGAAGAAGGTACATAGTTTACGCCTATTACTTAACATAATAGATTAGAGATCATATACTTAA  
ATATTTATTTAGGTACAATTTCAATTTACTCTCTTGACCGACACCTTGACTCTCCTTTGCCGCCTGAGCTGGCATCCACTGTGGCTCCTTT  
GCATCAGGAGGATGAGTTCGGAGCTCCACCTGTCTCTAAGACCTTGGTGGCCGTCGAAGTTACCGATACTAAGAACGGAGCCACTCACC  
ACTGGTCTCTGGAGAAGTTACGGTAGGTTCTTTATATCCGAAATCCATGCGAATTCCTGCTACTCCCTCACATTCATTCTTCTCTGCACT  
TTGGTTAAATTAATAAATAGCAGGCTTTTGATTTGAGTTGAATATTATTTAAATAATCCGTGCATGATGGTTGTAATAATGGATTCC  
AATGTCCCTCAAACGCTCTCTCATTTGATGGGTACTTGATACTTTGGGTGTAACATGGGCCACATAAA

***parental D1073E***

AATCCAGATTTCAACCAACCAAAACATCGTGCTTAGCCAAAACCGTAGACGTGGGTGCACATGGTAGTGGTCCAAATTTGGGACTACGCA  
CTGGCTGACTGATTGGTATGCTCGGTGGCAACATGCGACGTGGTGGTGGCCGGAAACAACTCCTGTTGGCATCCTTATGCAATGGG  
TGCGTCTGGTAGTGCCCAATATCTTGAACATTATGGGTTGGGTTCTCAAACTCGATGAAGGATTTGGTTACGGGTACAGTTATCTAC  
AGAAAAGATAACAGTTAATAATTGATATGGTGGAAAGCTCTGGTAATCTTGAATCTTCCACTTACGTTCTGAACATGGTAGAAGCCTA  
GAGGAGCACCCGATGCCGAATTTGACGGGTTCCGGTGGAGAAAGCCTCCTCATGACGATGCAAAAAGCTGTAAGGTAACAGTTTATA  
AACCACAAACCTAAAGTTAATTTCCGAAAGATTACGTAAGTGAAGTGGCAGAAAGATATCGGCATATTCAGCCCAATACCAGTGGCCTGT  
AGCACAGTGACCCGAAAGTGAACCTCTGCCCACCTGCAGATGCTCGCCAGGCTCCTCCGAATTTTCGTGGCACTCGGATGCGGAGTTA  
GAGTCAATGCCACGACCAGAGTCCACATCCTCAAGTTCTTTTACAATAATGAATATGAAA

***parental V1170M***

GTTCTCTGCACATCTCGCTGCTGCTCGATTTTTTTGTTCCCGGCCACCACCACGTCGCATGCACATAAAGGCTTCCCTGGTCGAGACGTTTCAT  
CCATTGCCACCGGGCATAACCAATCAGTCAGCCAGTGCCTAGTCCCAAATTTGGACCACTACCATGTGCACCCACGCTACGGTTTTGGCTA  
AGCACGATGTTTTGGTTTGGTTTGAATCTGTGAATTGGCTCCCAATGGAGAATATGTGCCATCGGTTAGTATGGCGCAGATGTAATCTT  
TCCCAGTCTCACACGCAATAATCCAAACATAAATTTGTCAACAGGTGGTGGAGCACAGCGATGATCTTCCCTGCCGCGGACTGTTCTCTT  
GCATCAGGGCATCCAGCGGCGCATTCTGTATTACTATCGTACATGAGCCACAACCGAGATGAAGTGAAGGACATCAATGAGTTGGTGG  
TTGGACGTATCCGCAATACACCGGAGTCATCCGACGAACAGGACGAAGACGCTGTGTCTTATCTTTGGGCTTGTCCAGGGCAGGGCTT  
TGGAGGTGCCCGGAGATGATAGATCTTTCTACCGTTTTGAGGCTGCCTGGGACTCGAGTCTGCACAACCTCGGCCACTGCTCAAGAAGGA  
ACGAAATCTTGGTCTCGCACTGCACGCGGGAAAC

***parental A1405V***

ATGTACCAGCTCTACTTATGTGCGCGCGAGTCAGAATCTTCATGGCTGGAGGCCAAGGGGTGACTCCCTGATCTTCGATCACCAGTGG  
GAGCTGGAGAACTCACCAGACTTGAAGAGTTGGACGCATGCGGCACCTTGCTTCTGCTGCGCGAACGTCTGGGCATGGACACCAACCC  
GAATCCGACCACCAAGACCGAGAAGGATGTTTGAATCTAGCTGCTCGGCGAGTCACATCACCCGTACATATGGTCATTCCACAATCGCC  
GCAGACTCCGGTCAAGGACCCACAGCAAATCATTCCAGAACGCGAGTACAACCAACGGGAGCAGGATCTCATGCTTAAATGCTTAAAT  
TGGTGCAGGGTGAGTTAATACTGAGACTTACCAAGCGTTCATTCACTCTATTCTAAATTCATTTAAGGACGCTATACTAAGAGCGAGGC  
CAACGATACGCAAACCTCAGTCGGATGTTTCGCCTAGCGATGAGGGATGTGCCGATATGACCGTCAGTGCATCTCCAGCAATTCATGGA  
GTGAGTAGTCGTTTAGCCACCCGTATAAACACACCACCCACACCAGCACCACCCATCTTAGTTAGCTGGACTCCCCCTCCGCAAACCTTC  
CTTAAATCCGGTTTTAGGGGCGAAAACCATCAAACCTGATTTGCGAACGTGGCTCCTCTTAGTAGGGCTTAA
