# Supplementary material
Source: PubMed Central journal article supplement (PMC3761313)
Supplement: dfb49a2138269fc369b9a773dc4897a2_genetics.113.151639-1.pdf [file dfb49a2138269fc369b9a773dc4897a2_genetics.113.151639-1.pdf]

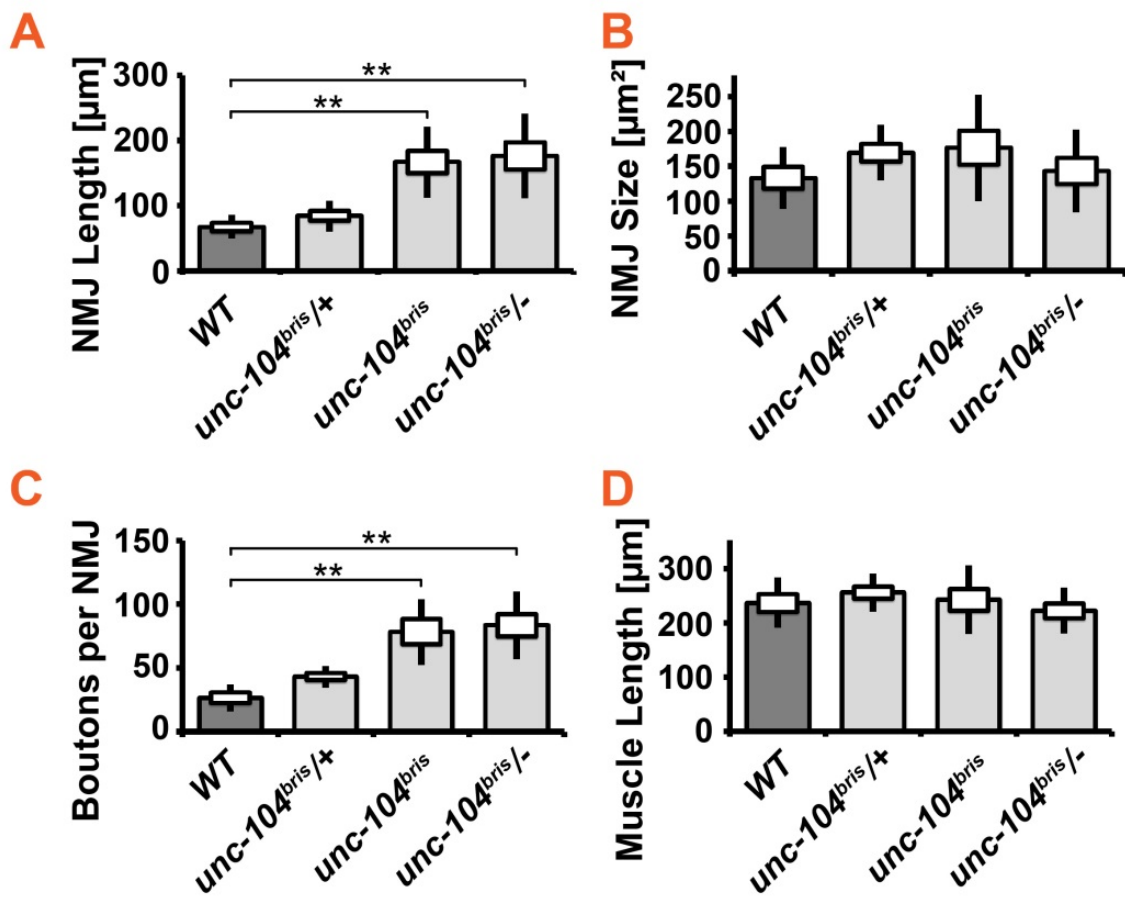

**Figure S1** Altered NMJ morphology in *unc-104<sup>bris</sup>/-* larvae. Analysis of NMJ 4, Segment A2 of mid third instar *Drosophila* wild-type, *unc-104<sup>bris</sup>/+*, *unc-104<sup>bris</sup>*, and *unc-104<sup>bris</sup>/-* larvae. Non-normalized raw data of NMJ length (**A**), NMJ size (**B**), bouton number (**C**) is shown. Data normalized by (D) the muscle length or area is shown in Figure 8 B,C,D. The SEM is shown as a box, the SD as a black line. \*\*  $p < 0.01$ .

File S1

Sequence raw data for genes listed in Figure 2B

*unc-104<sup>bris</sup> R561H*

CGCTGCTCAGAAACGATGGTGTGGAGCATGCGCGGGATTCTCACGAAGAAGACTCCGCATTTGGTCAACCTAAACGAGGATCCAATC  
TGTCTGAGTGTCTGCTTTACTACATCAAGGAGGGTCTAACTCGGTTGGGTACCCATGAAGCAAATGTGCCCCAGGACATTAGCTCTCCG  
GATCGCACATCCTCAAGGAGCACTGCACCTTTGAGAACAAGAACAGCACGGTTACATTGCTGCCACACAAGGATGCTATCATCTATGTAA  
ATGGACGCAAGTTGGTTGAACCGGAGGTTCTTAAGACCGGTTCTCACGTGATCCTCGGAAAGAACCACGTGTTCCGCTTTACCAATCCAG  
AACAGGCACGCGAATTACGGGATAAGATCGAGACCGAAAATGAGGCTGAGAACGAAGTGGAGAAGACAGACCCAGCAGGTGGACT  
GGAACCTTGCCAGTGCGAATTGCTCGAGAAGCAAGGCATTGATCTAAAAGCTGAAATGAAGAAGCGTTTAGACAACCTTGAGGGAACA  
GTACAAGCGGGAGAACTTCAGGCCGATCAGCAATTCGAGGAGCAGCGCAAAACGTACGAGGCTCGCATCGATGCTTTGCAAAAACAG  
GTTAGAAGACAAATCCAATGAA

*unc-104<sup>bris</sup> V772L*

AAGGAGCCAGTGCCGTTCCGTTGAGTTAAAGAAGAAGGTACATAGTTTACGCCTATTACTTAACATAATAGATTAGAGATCATATACTT  
AAATATTTATTTAGGTACAATTCCAATTTACTCTCTTGACCGACACCTTGTACTCTCTTTGCCGCTGAGCTGGCATCCACTGTGGCTCTC  
TTGCATCAGGAGGATGAGTTCGGAGCTCCACCTGTCTAAGACCTTGGTGGCCGTCGAAGTTACCGATACTAAGAACGGAGCCACTCA  
CCACTGGTCTCTGGAGAAGTTACGGTAGGTTCTTTATATCCGGAATCCATGCGAATTCCTGCTACTCCCTCACATTCATTCTTCTGCA  
CTTTGGTTAAAATTAATAAAAAAAGCTGGCTTTTGATTTGAGTTGAATATTTAAATAATACGTGCATGGGGGTTGTAGTTCATGGATT  
CTAGTTTCTATCAAACGCTCTAAAATTTGTTGGTTACTTTTATACTTTGGCTGTAATAAAGCAGAAAAAATCACAA

*unc-104<sup>bris</sup> D1073E*

TTCAAGATTTCAACCAAACCAAAACATCGTGCTTAGCCAAAACCGTAGACGTGGGTGCACATGGTAGTGGTCCAAATTTGGGACTACGCA  
CTGGCTGACTGATTGGTATGCTCGGTGGCAACATGCGACGTGGTGGTGGCCGGAAACAACTCCTGTTGGCATCCTTATGCAATGGG  
TGCGTCTGGTAGTGCCAAATATCTTGAACATTATGGGTTGGGTCTTCAAATACTCGATGAAGGATTTGGTTACGGGTACAGTTATCTAC  
AGAAAAGATAACAGTTAATAATTGATATGGTGGAAAGCTCTTGGTAATCTTGAATCTTCCACTTACGTTCTGAACATGGTAGAAGCCTA  
GAGGAGCACCCGATGCCGAATTTGACGGGTTCCGGTGGAGAAAGCCTCCTCATGACGATGCAAAAAGCTGAAAGGTAACAGTTTATA  
AACCACAAACCTAAAGTTAATTTCCGAAAGATTACGTACTTGAACCTGGCAGAAGATATCGGCATATTCAGCCCAATACCAAGTGGCCTGT  
AGCACAGTGACCCGAAAGTGAACCTCTTGCCACCTGCAGATGCTCGCCAGGCTCCTCCGAATTTCTGTTGCACTCGGATGCGGAGTTA  
GAGTCAATGCCACGACCAGAG

*unc-104<sup>bris</sup> V1170M*

ACGTCGTCGAGTCCAGGCAGCCTCAAACGGTAGAAAAGATCTATCATCTCCGGGCACCTCAAAGCCTCGCCTGGGAACAAGCCCAAAGA  
TAAGACACAGGCGTCTTCGTCCTGTCGCGATGACTCCGGTGTATTGCGGATACGTCCAACCACCAACTATTGATGTCCTTCCACTTC  
ATCTCGTTGTGGGCTCATGTACGATAGTAATACGAATGCGCCGCTGGATGCCCTGATGCAAGAGGAACAGTCCGCGCAGGGAAGAT  
CATCGCTGTGCTCCACCACCTGTTGACAAATTTATGTTTGGATTATTGCGTGTGAGACTGGGAAAGATTACATCTGCGCCATACTAACCGA  
TGGCACATATTCTCATTGGGAGCCAATTCACAGATTTCAAACCAACCAAAACATCGTGCTTAGCCAAAACCGTAGACGTGGGTGCACA  
TGGTAGTGGTCCAAATTTGGGACTACGCACTGGCTGACTGATTGGTATGCTCGGTGGCAACATGCGACGTGGTGGTGGCCGGGAAACA  
AACTCCTGTTGGCATCCTTATGCAATGGGTGCGTCTGGTAGTGCCAAAATATCTTGGA

***unc-104<sup>bris</sup> A1405V***

TTGTGACACCAGCTCTACTTATGTGCGCGGCGAGGAGAATCTTCATGGCTGGAGGCCAAGGGGTGACTCCCTGATCTTCGATCACCAGT  
GGGAGCTGGAGAACTCACCAGACTTGAAGAGGTTGGACGCATGCGGCACTTGCTTCTGCTGCGGAACGCTGGGCATGGACACCAA  
CCCGAATCCGACCACCAAGACCGAGAAGGATGTTTGCAATCTAGCTGCTCGGGCAGTCACATCACCCGTACATATGGTCATTCCACAATC  
GCCGAGACTCCGGTCAAGGACCCACAGCAAATCATTCCAGAACGCGAGTACAACCAACGGGAGCAGGATCTCATGCTTAAATGCTTAA  
AATTGGTGACGGGTGAGTTAATACTGAGACTTACCAAGCGTTCATTCACTCTATTCTAAATTCATTTAAGGACGCTATACTAAGAGCGA  
GGCCAACGATACGAAACTCAGTCGGATGTTTCGCTAGCGATGAGGGATGTGCCGATATGACCGTCAGCTGCATCTCCAGCAATCCAT  
GGAGTGAGTAGTCGTTTAGCCACCCGTATAAACACACCACCCACACCAGCACCACCCATCTTAGTTAGCTG

***parental R561R***

CGGCTGCGCACGTATGATGGATATCAGTTGGCGTATTCTCACCGAAGAAGACTCCGCATTTGGTCAACCTAAACGAGGATCCCAATCTGT  
CTGAGTGTCTGCTTTACTACATCAAGGAGGTTCTAACTCGGTTGGGTACCCATGAAGCAAATGTGCCCCAGGACATTCAGCTCTCCGGAT  
CGCACATCTCAAGGAGCACTGCACCTTTGAGAACAAGAACAGCAGCGTTACATTGCTGCCACACAAGGATGCTATCATCTATGTAAATG  
GACGCAAGTTGGTTGAACCGGAGGTTCTTAAGACCGGTTCTCGCGTGATCCTCGGAAAGAACCAGTGTTCCGCTTTACCAATCCAGAAC  
AGGCACGCGAATTACGGGATAAGATCGAGACCGAAAATGAGGCTGAGAACGAAGTGGAGAAGACAGACACCCAGCAGGTGGACTGGA  
ACTTTGCCAGTGCGAATTGCTCGAGAAGCAAGCATTGATCTAAAAGCTGAAATGAAGAAGCGTTTAGACAACCTGGAGGAACAGTAC  
AAGCGGGAGAACTTCAGGCCGATCAGCAATTGAGGAGCAGCGAAAACGTACGAGGCTCGCATCGATGCTTTGCAAACGGGAGGAA  
ACCCCCCCCCCTGCAGAGGGCACCCAGAAAACCTTAAGAAAAGGAATTTTCTCCTGAAAAAACACCCCATTTTAACGATATCTT  
TAAGGGGGGGCCCGTGGGTCATCATCTT

***parental V772L***

AGGAGCCAGTGCCGTTCCGTTGAGTTAAGAAGAAGGTACATAGTTTACGCCTATTACTTAACATAATAGATTAGAGATCATATACTTAA  
ATATTTATTTAGGTACAATTTCAATTTACTCTCTTGACCGACACCTTGACTCTCCTTTGCCGCCTGAGCTGGCATCCACTGTGGCTCCTTT  
GCATCAGGAGGATGAGTTCGGAGCTCCACCTGTCTCTAAGACCTTGGTGGCCGTCGAAGTTACCGATACTAAGAACGGAGCCACTCACC  
ACTGGTCTCTGGAGAAGTTACGGTAGGTTCTTTATATCCGAAATCCATGCGAATTCCTGCTACTCCCTCACATTCATTCTTCTCTGCACT  
TTGGTTAAATTAATAAATAGCAGGCTTTTGATTTGAGTTGAATATTTAAATAATCCGTGCATGATGGTTGTAATAATGGATTCC  
AATGTCCCTCAAACGCTCTCTCATTTGATGGGTACTTGATACTTTGGGTGTAACATGGGCCACATAAA

***parental D1073E***

AATCCAGATTTCAACCAACCAAAACATCGTGCTTAGCCAAAACCGTAGACGTGGGTGCACATGGTAGTGGTCCAAATTTGGGACTACGCA  
CTGGCTGACTGATTGGTATGCTCGGTGGCAACATGCGACGTGGTGGTGGCCGGAAACAACTCCTGTTGGCATCCTTATGCAATGGG  
TGCGTCTGGTAGTGCCCAATATCTTGAACATTATGGGTTGGGTTCTCAAACTCGATGAAGGATTTGGTTACGGGTACAGTTATCTAC  
AGAAAAGATAACAGTTAATAATTGATATGGTGGAAAGCTCTGGTAATCTTGAATCTTCCACTTACGTTCTGAACATGGTAGAAGCCTA  
GAGGAGCACCCGATGCCGAATTTGACGGGTTCCGGTGGAGAAAGCCTCCTCATGACGATGCAAAAAGCTGTAAGGTAACAGTTTATA  
AACCACAAACCTAAAGTTAATTTCCGAAAGATTACGTACTTGAACGGCAGAAGATATCGGCATATTCAGCCCAATACCAGTGGCCTGT  
AGCACAGTGACCCGAAAGTGAACCTTGGCCACCTGCAGATGCTCGCCAGGCTCCTCCGAATTTTCGTGGCACTCGGATGCGGAGTTA  
GAGTCAATGCCACGACCAGAGTCCACATCCTCAAGTTCTTTTACAATAATGAATATGAAA

***parental V1170M***

GTTCTCTGCACATCTCGCTGCTGCTCGATTTTTGTTCCCGGCCACCACCAGTCGCATGCACATAAAGGCTTCCCTGGTCGAGACGTTTCAT  
CCATTGCCACCGGGCATAACCAATCAGTCAGCCAGTGCCTAGTCCCAAATTTGGACCACTACCATGTGCACCCACGTCTACGGTTTTGGCTA  
AGCACGATGTTTTGGTTTGGTTTGAATCTGTGAATTGGCTCCCAATGGAGAATATGTGCCATCGGTTAGTATGGCGCAGATGTAATCTT  
TCCCAGTCTCACACGCAATAATCCAAACATAAATTTGTCAACAGGTGGTGGAGCACAGCGATGATCTTCCCTGCCGCGGACTGTTCTCTT  
GCATCAGGGCATCCAGCGGCGCATTTCGTATTACTATCGTACATGAGCCACAACCGAGATGAAGTGAAGGACATCAATGAGTTGGTGG  
TTGGACGTATCCGCAATACACCGGAGTCATCCGACGAACAGGACGAAGACGCTGTGTCTTATCTTTGGGCTTGTCCAGGCGAGGCTT  
TGGAGGTGCCCGGAGATGATAGATCTTCTACCGTTTTGAGGCTGCCTGGGACTCGAGTCTGCACAACCTCGGCCACTGCTCAAGAAGGA  
ACGAAATCTTGGTCTCGCACTGCACGCGGGAAC

***parental A1405V***

ATGTACCAGCTCTACTTATGTGCGCGCGAGTCAGAATCTTCATGGCTGGAGGCCAAGGGGTGACTCCCTGATCTTCGATCACCAGTGG  
GAGCTGGAGAACTCACCAGACTTGAAGAGTTGGACGCATGCGGCACCTTGCTTCTGCTGCGCGAACGTCTGGGCATGGACACCAACCC  
GAATCCGACCACCAAGACCGAGAAGGATGTTTGAATCTAGCTGCTCGGCGAGTCACATCACCCGTACATATGGTCATTCCACAATCGCC  
GCAGACTCCGGTCAAGGACCCACAGCAAATCATTCCAGAACGCGAGTACAACCAACGGGAGCAGGATCTCATGCTTAAATGCTTAAAT  
TGGTGCAGGGTGAGTTAATACTGAGACTTACCAAGCGTTCATTCACTCTATTCTAAATTCATTTAAGGACGCTATACTAAGAGCGAGGC  
CAACGATACGCAAACCTCAGTCGGATGTTTCGCCTAGCGATGAGGGATGTGCCGATATGACCGTCAGTGCATCTCCAGCAATTCATGGA  
GTGAGTAGTCGTTTAGCCACCCGTATAAACACACCACCCACACCAGCACCACCCATCTTAGTTAGCTGGACTCCCCCTCCGCAAACCTTC  
CTTAAATCCGGTTTTAGGGGCGAAAACCATCAAACCTGATTTGCGAACGTGGCTCCTCTTAGTAGGGCTTAA

Table S1 Statistical tests used in this study

Figure: 2E

| Number: | Genotype:                                                                               | n: |
|---------|-----------------------------------------------------------------------------------------|----|
| 1       | <i>w<sup>1118</sup></i> ; (WT)                                                          | 5  |
| 2       | <i>;unc-104<sup>bris</sup>/unc-104<sup>bris</sup></i> ( <i>unc-104<sup>bris</sup></i> ) | 6  |

Test: Student's two-tailed t-test

p-Value:

|   | 1    |
|---|------|
| 1 |      |
| 2 | n.s. |

Figure: 2F

| Number: | Genotype:                                                                                                                   | n: |
|---------|-----------------------------------------------------------------------------------------------------------------------------|----|
| 1       | <i>elav<sup>C155</sup>-Gal4/+; ;UAS-unc-104<sup>mCherry</sup>/+</i> (control)                                               | 9  |
| 2       | <i>;unc-104<sup>bris</sup>/unc-104<sup>d11024</sup>;UAS-unc-104<sup>mCherry</sup>/+</i> ( <i>unc-104<sup>bris</sup>/-</i> ) | 10 |
| 3       | <i>elav<sup>C155</sup>-Gal4/+;unc-104<sup>bris</sup>/unc-104<sup>d11024</sup>;UAS-unc-104<sup>mCherry</sup>/+</i> (rescue)  | 9  |

Test: One-Way ANOVA followed by Tukey's Multiple Comparison test

p-Value:

|   | 1 | 2   | 3    |
|---|---|-----|------|
| 1 |   | *** | n.s. |
| 2 |   |     | ***  |
| 3 |   |     |      |

Figure: 4A

| Number: | Genotype:                                                                                                    | n: |
|---------|--------------------------------------------------------------------------------------------------------------|----|
| 1       | <i>w<sup>1118</sup></i> ; (WT)                                                                               | 6  |
| 2       | <i>;unc-104<sup>bris</sup>/unc-104<sup>bris</sup></i> ( <i>unc<sup>bris</sup></i> )                          | 8  |
| 3       | <i>;unc-104<sup>bris</sup>/unc-104<sup>d11024</sup></i> ( <i>unc-104<sup>bris</sup>/-</i> )                  | 8  |
| 4       | <i>elavX-Gal4/+; ;UAS-unc-104<sup>mCherry</sup>/+</i> (control)                                              | 6  |
| 5       | <i>elavX-Gal4/+;unc-104<sup>bris</sup>/unc-104<sup>d11024</sup>;UAS-unc-104<sup>mCherry</sup>/+</i> (rescue) | 6  |

Test: One-Way ANOVA followed by Tukey's Multiple Comparison test

p-Value:

|   | 1    | 1    |
|---|------|------|
| 1 |      |      |
| 2 | ***  | ***  |
| 3 | ***  | ***  |
| 4 | n.s. | n.s. |
| 5 | n.s. | n.s. |

1-2.5 mm                      2.6-4 mm

Figure: 6C

| Number: | Genotype:                                                                                                                     | n: |
|---------|-------------------------------------------------------------------------------------------------------------------------------|----|
| 1       | <i>elav<sup>C155</sup>-Gal4 /+; ;UAS-unc-104<sup>mCherry</sup> /+ (control)</i>                                               | 9  |
| 2       | <i>;unc-104<sup>bris</sup> /unc-104<sup>d11024</sup>; UAS-unc-104<sup>mCherry</sup> /+ (unc-104<sup>bris</sup> /-)</i>        | 10 |
| 3       | <i>elav<sup>C155</sup>-Gal4/+;unc-104<sup>bris</sup> /unc-104<sup>d11024</sup>; UAS-unc-104<sup>mCherry</sup> /+ (rescue)</i> | 9  |

Test: Kruskal-Wallis H-test followed by Mann-Whitney pairwise comparison test

p-Value: (Bonferroni corrected)

|   | 1 | 2   | 3    |
|---|---|-----|------|
| 1 |   | *** | n.s. |
| 2 |   |     | **   |
| 3 |   |     |      |

Figure: 6D

| Number: | Genotype:                                                                                                                     | n: |
|---------|-------------------------------------------------------------------------------------------------------------------------------|----|
| 1       | <i>elav<sup>C155</sup>-Gal4 /+; ;UAS-unc-104<sup>mCherry</sup> /+ (control)</i>                                               | 9  |
| 2       | <i>;unc-104<sup>bris</sup> /unc-104<sup>d11024</sup>; UAS-unc-104<sup>mCherry</sup> /+ (unc-104<sup>bris</sup> /-)</i>        | 10 |
| 3       | <i>elav<sup>C155</sup>-Gal4/+;unc-104<sup>bris</sup> /unc-104<sup>d11024</sup>; UAS-unc-104<sup>mCherry</sup> /+ (rescue)</i> | 9  |

Test: Kruskal-Wallis H-test followed by Mann-Whitney pairwise comparison test

p-Value: (Bonferroni corrected)

|   | 1 | 2  | 3    |
|---|---|----|------|
| 1 |   | ** | n.s. |
| 2 |   |    | *    |
| 3 |   |    |      |

Figure: 7B

| Number: | Genotype:                                                                                                                      | n: |
|---------|--------------------------------------------------------------------------------------------------------------------------------|----|
| 1       | <i>elav<sup>C155</sup>-Gal4 /+;; (control)</i>                                                                                 | 9  |
| 2       | <i>elav<sup>C155</sup>-Gal4 /+;unc-104<sup>bris</sup> /unc-104<sup>d11024</sup> (unc-104<sup>bris</sup> /-)</i>                | 8  |
| 3       | <i>elav<sup>C155</sup>-Gal4 /+;unc-104<sup>bris</sup> /unc-104<sup>d11024</sup>; UAS-Brp (unc-104<sup>bris</sup> /-; Brp↑)</i> | 8  |

Test: Kruskal-Wallis H-test followed by Mann-Whitney pairwise comparison test

p-Value: (Bonferroni corrected)

|   | 1 | 2 | 3    |
|---|---|---|------|
| 1 |   | * | n.s. |
| 2 |   |   | **   |
| 3 |   |   |      |

Figure: 7C

| Number: | Genotype:                                                                                                                       | n: |
|---------|---------------------------------------------------------------------------------------------------------------------------------|----|
| 1       | <i>elav<sup>C155</sup>-Gal4 /+;; (control)</i>                                                                                  | 9  |
| 2       | <i>elav<sup>C155</sup>-Gal4 /+;unc-104<sup>bris</sup>/unc-104<sup>d11024</sup> (unc-104<sup>bris</sup> /-)</i>                  | 8  |
| 3       | <i>elav<sup>C155</sup>-Gal4 /+;unc-104<sup>bris</sup>/unc-104<sup>d11024</sup>;UAS-Brp/+ (unc-104<sup>bris</sup> /-; Brp ↑)</i> | 8  |

Test: Kruskal-Wallis H-test followed by Mann-Whitney pairwise comparison test

p-Value: (Bonferroni corrected)

|   | 1 | 2  | 3    |
|---|---|----|------|
| 1 |   | ** | n.s. |
| 2 |   |    | **   |
| 3 |   |    |      |

Figure: 7D

| Number: | Genotype:                                                                                                                       | n: |
|---------|---------------------------------------------------------------------------------------------------------------------------------|----|
| 1       | <i>elav<sup>C155</sup>-Gal4 /+;; (control)</i>                                                                                  | 9  |
| 2       | <i>elav<sup>C155</sup>-Gal4 /+;unc-104<sup>bris</sup>/unc-104<sup>d11024</sup> (unc-104<sup>bris</sup> /-)</i>                  | 8  |
| 3       | <i>elav<sup>C155</sup>-Gal4 /+;unc-104<sup>bris</sup>/unc-104<sup>d11024</sup>;UAS-Brp/+ (unc-104<sup>bris</sup> /-; Brp ↑)</i> | 8  |

Test: Kruskal-Wallis H-test followed by Mann-Whitney pairwise comparison test

p-Value: (Bonferroni corrected)

|   | 1 | 2  | 3  |
|---|---|----|----|
| 1 |   | ** | ** |
| 2 |   |    | *  |
| 3 |   |    |    |

Figure: 8B

| Number: | Genotype:                                                                            | n: |
|---------|--------------------------------------------------------------------------------------|----|
| 1       | <i>w<sup>1118</sup>;; (WT)</i>                                                       | 7  |
| 2       | <i>;unc-104<sup>bris</sup> /+ (unc-104<sup>bris</sup> /+)</i>                        | 9  |
| 3       | <i>;unc-104<sup>bris</sup> /unc-104<sup>bris</sup> (unc-104<sup>bris</sup>)</i>      | 7  |
| 4       | <i>;unc-104<sup>bris</sup> /unc-104<sup>d11024</sup> (unc-104<sup>bris</sup> /-)</i> | 9  |

Test: Kruskal-Wallis H-test followed by Mann-Whitney pairwise comparison test

p-Value: (Bonferroni corrected)

|   | 1 | 2    | 3    | 4    |
|---|---|------|------|------|
| 1 |   | n.s. | *    | **   |
| 2 |   |      | n.s. | **   |
| 3 |   |      |      | n.s. |
| 4 |   |      |      |      |

**Figure: 8C**

| Number: | Genotype:                                                 | n: |
|---------|-----------------------------------------------------------|----|
| 1       | $w^{1118};$ (WT)                                          | 7  |
| 2       | $;unc-104^{bris}/+$ ( $unc-104^{bris}/+$ )                | 9  |
| 3       | $;unc-104^{bris}/unc-104^{bris}$ ( $unc-104^{bris}$ )     | 7  |
| 4       | $;unc-104^{bris}/unc-104^{d11024}$ ( $unc-104^{bris}/-$ ) | 9  |

**Test:** Kruskal-Wallis H-test followed by Mann-Whitney pairwise comparison test

**p-Value:** (Bonferroni corrected)

|   | 1 | 2    | 3    | 4    |
|---|---|------|------|------|
| 1 |   | n.s. | n.s. | n.s. |
| 2 |   |      | n.s. | n.s. |
| 3 |   |      |      | n.s. |
| 4 |   |      |      |      |

**Figure: 8D**

| Number: | Genotype:                                                 | n: |
|---------|-----------------------------------------------------------|----|
| 1       | $w^{1118};$ (WT)                                          | 7  |
| 2       | $;unc-104^{bris}/+$ ( $unc-104^{bris}/+$ )                | 9  |
| 3       | $;unc-104^{bris}/unc-104^{bris}$ ( $unc-104^{bris}$ )     | 7  |
| 4       | $;unc-104^{bris}/unc-104^{d11024}$ ( $unc-104^{bris}/-$ ) | 9  |

**Test:** Kruskal-Wallis H-test followed by Mann-Whitney pairwise comparison test

**p-Value:** (Bonferroni corrected)

|   | 1 | 2    | 3 | 4    |
|---|---|------|---|------|
| 1 |   | n.s. | * | **   |
| 2 |   |      | * | *    |
| 3 |   |      |   | n.s. |
| 4 |   |      |   |      |

**Figure: 8F**

| Number: | Genotype:                                                 | n: |
|---------|-----------------------------------------------------------|----|
| 1       | $w^{1118};$ (WT)                                          | 8  |
| 2       | $;unc-104^{bris}/+$ ( $unc-104^{bris}/+$ )                | 10 |
| 3       | $;unc-104^{bris}/unc-104^{bris}$ ( $unc-104^{bris}$ )     | 10 |
| 4       | $;unc-104^{bris}/unc-104^{d11024}$ ( $unc-104^{bris}/-$ ) | 10 |

**Test:** One-Way ANOVA followed by Tukey's Multiple Comparison test

**p-Value:** (Bonferroni corrected)

|   | 1 | 2   | 3   | 4    |
|---|---|-----|-----|------|
| 1 |   | *** | *** | ***  |
| 2 |   |     | *** | ***  |
| 3 |   |     |     | n.s. |
| 4 |   |     |     |      |



**Figure: 8G**

| Number: | Genotype:                                                 | n: |
|---------|-----------------------------------------------------------|----|
| 1       | $w^{1118};$ (WT)                                          | 8  |
| 2       | $;unc-104^{bris}/+$ ( $unc-104^{bris}/+$ )                | 10 |
| 3       | $;unc-104^{bris}/unc-104^{bris}$ ( $unc-104^{bris}$ )     | 10 |
| 4       | $;unc-104^{bris}/unc-104^{d11024}$ ( $unc-104^{bris}/-$ ) | 10 |

**Test:** One-Way ANOVA followed by Tukey's Multiple Comparison test

**p-Value:** (Bonferroni corrected)

|   | 1 | 2  | 3   | 4    |
|---|---|----|-----|------|
| 1 |   | ** | *** | ***  |
| 2 |   |    | *** | ***  |
| 3 |   |    |     | n.s. |
| 4 |   |    |     |      |

**Figure: 8I**

| Number: | Genotype:                                                 | n: |
|---------|-----------------------------------------------------------|----|
| 1       | $w^{1118};$ (WT)                                          | 10 |
| 2       | $;unc-104^{bris}/+$ ( $unc-104^{bris}/+$ )                | 10 |
| 3       | $;unc-104^{bris}/unc-104^{bris}$ ( $unc-104^{bris}$ )     | 10 |
| 4       | $;unc-104^{bris}/unc-104^{d11024}$ ( $unc-104^{bris}/-$ ) | 10 |

**Test:** Kruskal-Wallis H-test followed by Mann-Whitney pairwise comparison test

**p-Value:** (Bonferroni corrected)

|   | 1 | 2    | 3  | 4  |
|---|---|------|----|----|
| 1 |   | n.s. | ** | ** |
| 2 |   |      | ** | ** |
| 3 |   |      |    | ** |
| 4 |   |      |    |    |

**Figure: 8J**

| Number: | Genotype:                                                 | n: |
|---------|-----------------------------------------------------------|----|
| 1       | $w^{1118};$ (WT)                                          | 10 |
| 2       | $;unc-104^{bris}/+$ ( $unc-104^{bris}/+$ )                | 10 |
| 3       | $;unc-104^{bris}/unc-104^{bris}$ ( $unc-104^{bris}$ )     | 10 |
| 4       | $;unc-104^{bris}/unc-104^{d11024}$ ( $unc-104^{bris}/-$ ) | 10 |

**Test:** Kruskal-Wallis H-test followed by Mann-Whitney pairwise comparison test

**p-Value:** (Bonferroni corrected)

|   | 1 | 2    | 3    | 4    |
|---|---|------|------|------|
| 1 |   | n.s. | *    | *    |
| 2 |   |      | n.s. | *    |
| 3 |   |      |      | n.s. |
| 4 |   |      |      |      |

**Figure: 8K**

| Number: | Genotype:                                                                          | n: |
|---------|------------------------------------------------------------------------------------|----|
| 1       | <i>w<sup>1118</sup></i> ; (WT)                                                     | 8  |
| 2       | <i>;unc-104<sup>bris</sup>/+ (unc-104<sup>bris</sup>/+)</i>                        | 10 |
| 3       | <i>;unc-104<sup>bris</sup>/unc-104<sup>bris</sup> (unc-104<sup>bris</sup>)</i>     | 10 |
| 4       | <i>;unc-104<sup>bris</sup>/unc-104<sup>d11024</sup> (unc-104<sup>bris</sup>/-)</i> | 10 |

**Test:** Kruskal-Wallis H-test followed by Dunn's Multiple Comparison test

**p-Value:**

|   | 1 | 2    | 3 | 4    |
|---|---|------|---|------|
| 1 |   | n.s. | * | ***  |
| 2 |   |      | * | ***  |
| 3 |   |      |   | n.s. |
| 4 |   |      |   |      |

**Figure: 9B**

| Number: | Genotype:                                                                                                                  | n: |
|---------|----------------------------------------------------------------------------------------------------------------------------|----|
| 1       | <i>elav<sup>C155</sup>-Gal4/+; ;UAS-unc-104<sup>mCherry</sup>/+ (control)</i>                                              | 9  |
| 2       | <i>;unc-104<sup>bris</sup>/unc-104<sup>d11024</sup>;UAS-unc-104<sup>mCherry</sup>/+ (unc-104<sup>bris</sup>/-)</i>         | 11 |
| 3       | <i>elav<sup>C155</sup>-Gal4/+;unc-104<sup>bris</sup>/unc-104<sup>d11024</sup>;UAS-unc-104<sup>mCherry</sup>/+ (rescue)</i> | 8  |

**Test:** Kruskal-Wallis H-test followed by Mann-Whitney pairwise comparison test

**p-Value:** (Bonferroni corrected)

|   | 1 | 2  | 3    |
|---|---|----|------|
| 1 |   | ** | n.s. |
| 2 |   |    | **   |
| 3 |   |    |      |

**Figure: 9C**

| Number: | Genotype:                                                                                                                  | n: |
|---------|----------------------------------------------------------------------------------------------------------------------------|----|
| 1       | <i>elav<sup>C155</sup>-Gal4/+; ;UAS-unc-104<sup>mCherry</sup>/+ (control)</i>                                              | 9  |
| 2       | <i>;unc-104<sup>bris</sup>/unc-104<sup>d11024</sup>;UAS-unc-104<sup>mCherry</sup>/+ (unc-104<sup>bris</sup>/-)</i>         | 11 |
| 3       | <i>elav<sup>C155</sup>-Gal4/+;unc-104<sup>bris</sup>/unc-104<sup>d11024</sup>;UAS-unc-104<sup>mCherry</sup>/+ (rescue)</i> | 8  |

**Test:** Kruskal-Wallis H-test followed by Mann-Whitney pairwise comparison test

**p-Value:** (Bonferroni corrected)

|   | 1 | 2    | 3    |
|---|---|------|------|
| 1 |   | n.s. | n.s. |
| 2 |   |      | n.s. |
| 3 |   |      |      |

Figure: 9D

| Number: | Genotype:                                                                                                                          | n: |
|---------|------------------------------------------------------------------------------------------------------------------------------------|----|
| 1       | <i>elav<sup>C155</sup>-Gal4/+; ;UAS-unc-104<sup>mCherry</sup>/+</i> (control)                                                      | 9  |
| 2       | <i>;unc-104<sup>bris</sup>/unc-104<sup>d11024</sup>;UAS-unc-104<sup>mCherry</sup>/+</i> ( <b><i>unc-104<sup>bris</sup>/-</i></b> ) | 11 |
| 3       | <i>elav<sup>C155</sup>-Gal4/+;unc-104<sup>bris</sup>/unc-104<sup>d11024</sup>;UAS-unc-104<sup>mCherry</sup>/+</i> (rescue)         | 8  |

Test: Kruskal-Wallis H-test followed by Mann-Whitney pairwise comparison test

p-Value: (Bonferroni corrected)

|   | 1 | 2  | 3    |
|---|---|----|------|
| 1 |   | ** | n.s. |
| 2 |   |    | **   |
| 3 |   |    |      |

Figure: 9F

| Number: | Genotype:                                                                                                                          | n: |
|---------|------------------------------------------------------------------------------------------------------------------------------------|----|
| 1       | <i>elav<sup>C155</sup>-Gal4/+; ;UAS-unc-104<sup>mCherry</sup>/+</i> (control)                                                      | 9  |
| 2       | <i>;unc-104<sup>bris</sup>/unc-104<sup>d11024</sup>;UAS-unc-104<sup>mCherry</sup>/+</i> ( <b><i>unc-104<sup>bris</sup>/-</i></b> ) | 10 |
| 3       | <i>elav<sup>C155</sup>-Gal4/+;unc-104<sup>bris</sup>/unc-104<sup>d11024</sup>;UAS-unc-104<sup>mCherry</sup>/+</i> (rescue)         | 9  |

Test: One-Way ANOVA followed by Tukey's Multiple Comparison test

p-Value:

|   | 1 | 2   | 3    |
|---|---|-----|------|
| 1 |   | *** | n.s. |
| 2 |   |     | ***  |
| 3 |   |     |      |

Figure: 9G

| Number: | Genotype:                                                                                                                          | n: |
|---------|------------------------------------------------------------------------------------------------------------------------------------|----|
| 1       | <i>elav<sup>C155</sup>-Gal4/+; ;UAS-unc-104<sup>mCherry</sup>/+</i> (control)                                                      | 9  |
| 2       | <i>;unc-104<sup>bris</sup>/unc-104<sup>d11024</sup>;UAS-unc-104<sup>mCherry</sup>/+</i> ( <b><i>unc-104<sup>bris</sup>/-</i></b> ) | 10 |
| 3       | <i>elav<sup>C155</sup>-Gal4/+;unc-104<sup>bris</sup>/unc-104<sup>d11024</sup>;UAS-unc-104<sup>mCherry</sup>/+</i> (rescue)         | 9  |

Test: One-Way ANOVA followed by Tukey's Multiple Comparison test

p-Value:

|   | 1 | 2   | 3    |
|---|---|-----|------|
| 1 |   | *** | n.s. |
| 2 |   |     | ***  |
| 3 |   |     |      |

Figure: 11B

| Number: | Genotype:                                                                                                      | n: |
|---------|----------------------------------------------------------------------------------------------------------------|----|
| 1       | <i>elav<sup>C155</sup>-Gal4 /+;unc-104<sup>bris</sup>/unc-104<sup>d11024</sup> (unc-104<sup>bris</sup> /-)</i> | 8  |
| 2       | <i>elav<sup>C155</sup>-Gal4 /+;unc-104<sup>bris</sup>/unc-104<sup>d11024</sup>; UAS-Brp-RNAi (Brp ↓)</i>       | 8  |
| 3       | <i>elav<sup>C155</sup>-Gal4 /+;unc-104<sup>bris</sup>/unc-104<sup>d11024</sup>; UAS-Brp (Brp ↑)</i>            | 8  |

Test: One-Way ANOVA followed by Tukey's Multiple Comparison test

p-Value:

|   | 1 | 2    | 3    |
|---|---|------|------|
| 1 |   | n.s. | n.s. |
| 2 |   |      | n.s. |
| 3 |   |      |      |

Figure: 11C

| Number: | Genotype:                                                                                                      | n: |
|---------|----------------------------------------------------------------------------------------------------------------|----|
| 1       | <i>elav<sup>C155</sup>-Gal4 /+;unc-104<sup>bris</sup>/unc-104<sup>d11024</sup> (unc-104<sup>bris</sup> /-)</i> | 8  |
| 2       | <i>elav<sup>C155</sup>-Gal4 /+;unc-104<sup>bris</sup>/unc-104<sup>d11024</sup>; UAS-Brp-RNAi (Brp ↓)</i>       | 8  |
| 3       | <i>elav<sup>C155</sup>-Gal4 /+;unc-104<sup>bris</sup>/unc-104<sup>d11024</sup>; UAS-Brp (Brp ↑)</i>            | 8  |

Test: One-Way ANOVA followed by Tukey's Multiple Comparison test

p-Value:

|   | 1 | 2    | 3    |
|---|---|------|------|
| 1 |   | n.s. | n.s. |
| 2 |   |      | n.s. |
| 3 |   |      |      |

Figure: 11D

| Number: | Genotype:                                                                                                      | n: |
|---------|----------------------------------------------------------------------------------------------------------------|----|
| 1       | <i>elav<sup>C155</sup>-Gal4 /+;unc-104<sup>bris</sup>/unc-104<sup>d11024</sup> (unc-104<sup>bris</sup> /-)</i> | 8  |
| 2       | <i>elav<sup>C155</sup>-Gal4 /+;unc-104<sup>bris</sup>/unc-104<sup>d11024</sup>; UAS-Brp-RNAi (Brp ↓)</i>       | 8  |
| 3       | <i>elav<sup>C155</sup>-Gal4 /+;unc-104<sup>bris</sup>/unc-104<sup>d11024</sup>; UAS-Brp (Brp ↑)</i>            | 8  |

Test: One-Way ANOVA followed by Tukey's Multiple Comparison test

p-Value:

|   | 1 | 2    | 3    |
|---|---|------|------|
| 1 |   | n.s. | n.s. |
| 2 |   |      | n.s. |
| 3 |   |      |      |

Figure: 11E

| Number: | Genotype:                                                                                                       | n: |
|---------|-----------------------------------------------------------------------------------------------------------------|----|
| 1       | <i>elav<sup>C155</sup>-Gal4 /+;unc-104<sup>bris</sup> /unc-104<sup>d11024</sup> (unc-104<sup>bris</sup> /-)</i> | 8  |
| 2       | <i>elav<sup>C155</sup>-Gal4 /+;unc-104<sup>bris</sup> /unc-104<sup>d11024</sup>; UAS-Brp-RNAi (Brp ↓)</i>       | 8  |
| 3       | <i>elav<sup>C155</sup>-Gal4 /+;unc-104<sup>bris</sup> /unc-104<sup>d11024</sup>; UAS-Brp (Brp ↑)</i>            | 8  |

Test: One-Way ANOVA followed by Tukey's Multiple Comparison test

p-Value:

|   | 1 | 2    | 3    |
|---|---|------|------|
| 1 |   | n.s. | n.s. |
| 2 |   |      | n.s. |
| 3 |   |      |      |

Figure: 11F

| Number: | Genotype:                                                                                                       | n: |
|---------|-----------------------------------------------------------------------------------------------------------------|----|
| 1       | <i>elav<sup>C155</sup>-Gal4 /+;unc-104<sup>bris</sup> /unc-104<sup>d11024</sup> (unc-104<sup>bris</sup> /-)</i> | 8  |
| 2       | <i>elav<sup>C155</sup>-Gal4 /+;unc-104<sup>bris</sup> /unc-104<sup>d11024</sup>; UAS-Brp-RNAi (Brp ↓)</i>       | 8  |
| 3       | <i>elav<sup>C155</sup>-Gal4 /+;unc-104<sup>bris</sup> /unc-104<sup>d11024</sup>; UAS-Brp (Brp ↑)</i>            | 8  |

Test: One-Way ANOVA followed by Tukey's Multiple Comparison test

p-Value:

|   | 1 | 2    | 3    |
|---|---|------|------|
| 1 |   | n.s. | n.s. |
| 2 |   |      | n.s. |
| 3 |   |      |      |
