# Supplementary material
Source: PubMed Central journal article supplement (PMC3761313)
Supplement: f9ab16b0b1a9809ceb0d7b8ce87ac927_genetics.113.151639-3.pdf [file f9ab16b0b1a9809ceb0d7b8ce87ac927_genetics.113.151639-3.pdf]

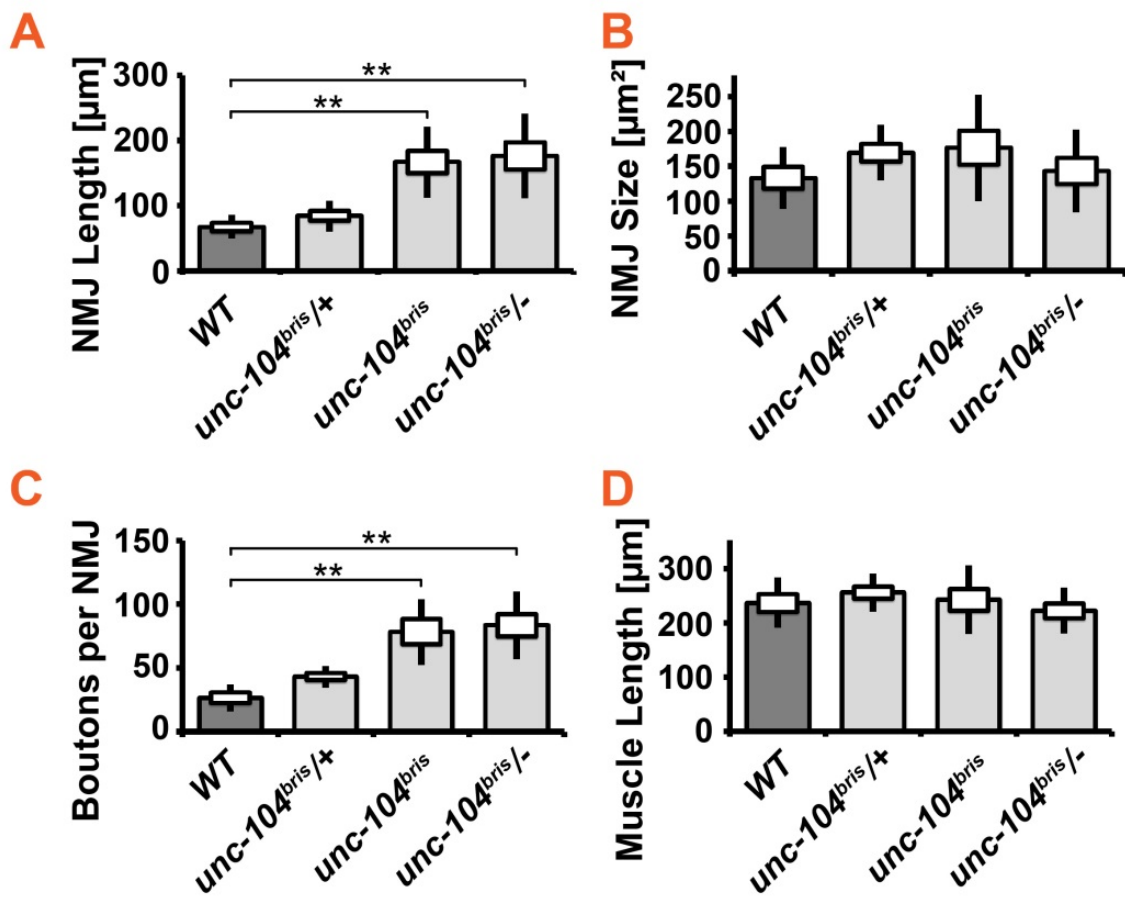

**Figure S1** Altered NMJ morphology in *unc-104<sup>bris</sup>/-* larvae. Analysis of NMJ 4, Segment A2 of mid third instar *Drosophila* wild-type, *unc-104<sup>bris</sup>/+*, *unc-104<sup>bris</sup>*, and *unc-104<sup>bris</sup>/-* larvae. Non-normalized raw data of NMJ length (**A**), NMJ size (**B**), bouton number (**C**) is shown. Data normalized by (D) the muscle length or area is shown in Figure 8 B,C,D. The SEM is shown as a box, the SD as a black line. \*\*  $p < 0.01$ .
